# Supplementary material
Source: PubMed Central journal article supplement (PMC7316190)
Supplement: NIHMS1596323-supplement-Supporting_Info.pdf [file NIHMS1596323-supplement-Supporting_Info.pdf]

Supporting Information for

# Selective Manipulation of Biomolecules with Insulator-Based Dielectrophoretic Tweezers

*Myungkeun Oh<sup>1,‡</sup>, Vidura Jayasooriya<sup>2,‡</sup>, Sung Oh Woo<sup>3</sup>, Dharmakeerthi Nawarathna<sup>2,\*</sup>, and  
Yongki Choi<sup>1,3,\*</sup>*

*<sup>1</sup>Materials and Nanotechnology Program, <sup>2</sup>Department of Electrical and Computer Engineering,  
and <sup>3</sup>Department of Physics, North Dakota State University, Fargo, North Dakota 58108, USA*

Corresponding Author:

\*E-mail: dharmakeerthi.nawara@ndsu.edu (D. N.) or yongki.choi@ndsu.edu (Y.C.)

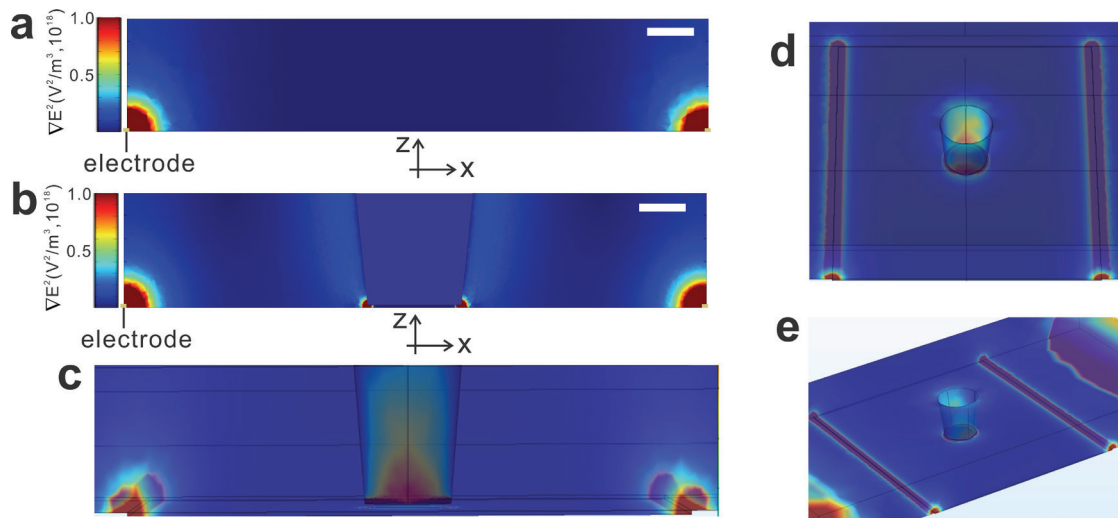

**Figure S1.** The distribution of  $\nabla E^2$  calculated by COMSOL simulation. (a) Localized  $\nabla E^2$  at the both electrode under AC voltage  $V_{ac}$  ( $7 V_{pp}$ ,  $f = 50$  kHz). The scale bar is  $5 \mu\text{m}$ . (b) Distribution of the additional localized  $\nabla E^2$  at the tip. (c) Cross sectional view of  $\nabla E^2$  distribution. (d) Top and (e) side view of  $\nabla E^2$  distribution.

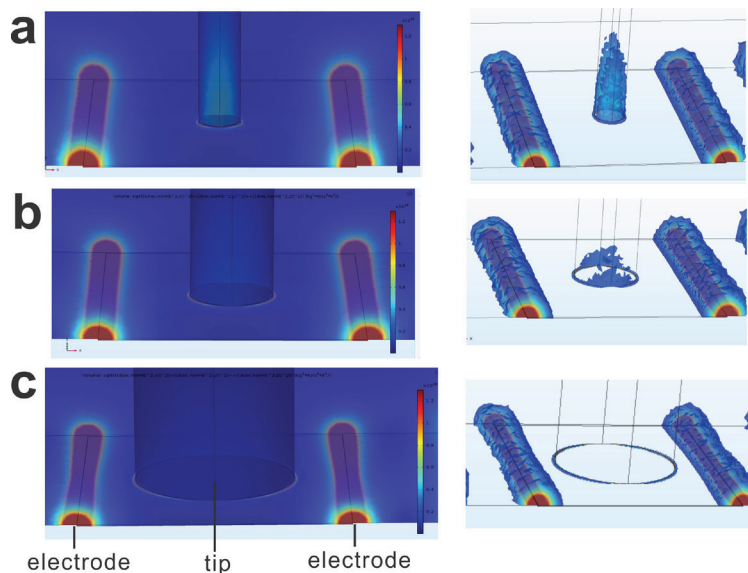

**Figure S2.** The distribution of  $\nabla E^2$  around the tip with its diameter of (a)  $4 \mu\text{m}$  (b)  $5 \mu\text{m}$ , and (c)  $15 \mu\text{m}$ . For the small tip, the concentrated field at the tip is proportional to the area of the tip ( $\pi r^2$ ). In contrast, the field partially interacts with the large tip. Thus, about a quarter of rim contacts with each electrode, and the effective trapping volume is proportional to the circumference of the tip ( $\pi r$ ). Our experiments show that the tip diameter of  $4 \sim 8 \mu\text{m}$  offers the most effective trapping of the particles and DNA in our devices.

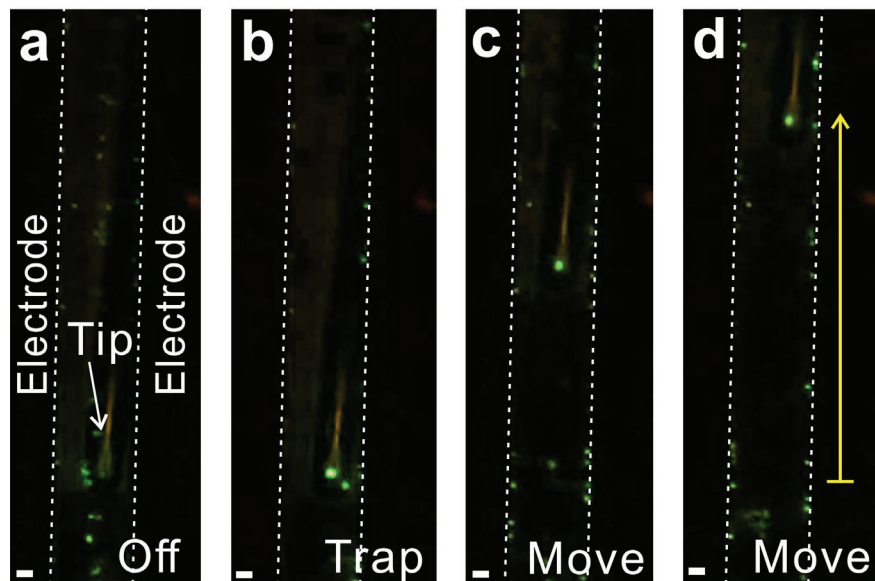

**Figure S3.** Additional example of nanoparticle manipulation. (a) No AC bias. (b) – (d) Trapping and repositioning of the particles at the tip with the pDEP bias (5 V, 20 kHz). The yellow arrow is 112  $\mu\text{m}$ . The scalar bar is 5  $\mu\text{m}$ .

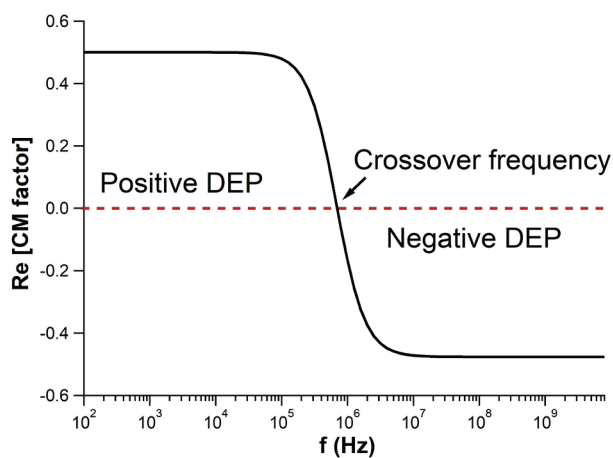

**Figure S4.** Real part of the CM factor of the spherical particle. In calculating this plot, the following parameters were used:  $\epsilon_p = 2.5\epsilon_0$ ,  $\epsilon_m = 78\epsilon_0$ ,  $\sigma_p = 4 \times 10^{-3} \text{ S/m}$ ,  $\sigma_m = 1 \times 10^{-3} \text{ S/m}$ .

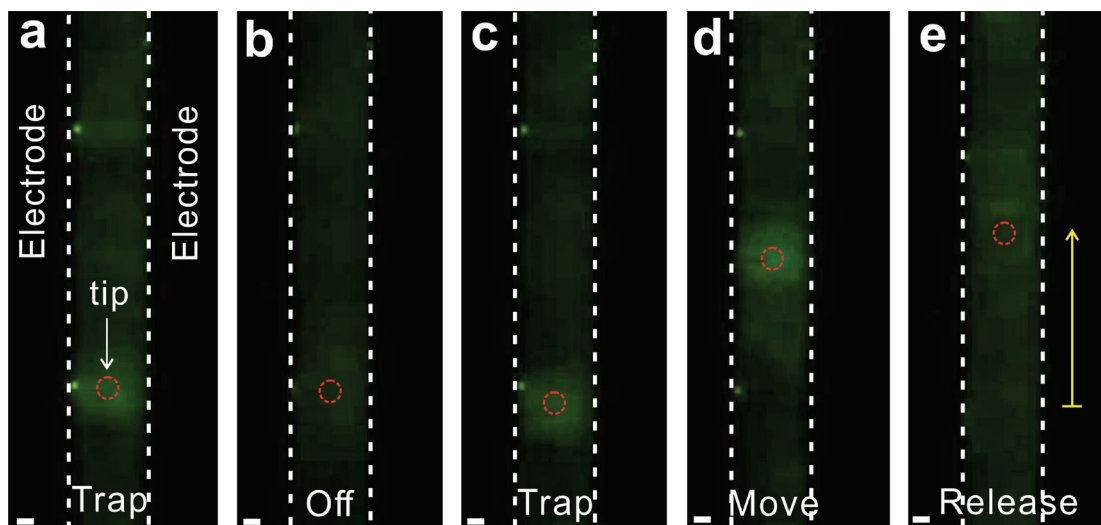

**Figure S5.** Additional example of homogeneous (48,502 base pairs) DNA manipulation under the pDEP bias ( $7 V_{pp}$ ,  $f = 200$  kHz). (a) Tapping, (b) releasing, (c) re-trapping, (d) repositioning, and (e) releasing of DNA at the tip (the red circle). The yellow arrow is  $56 \mu\text{m}$ . The scalar bar is  $5 \mu\text{m}$ .

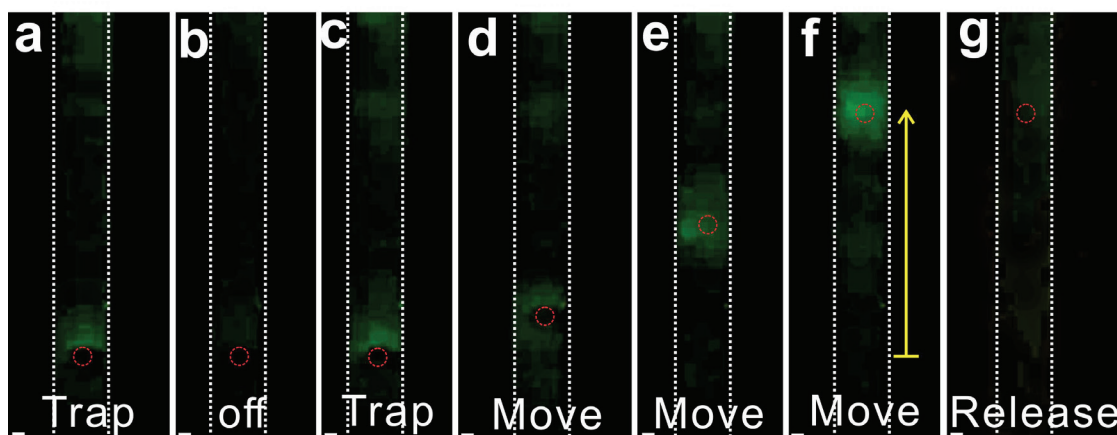

**Figure S6.** Spatial manipulation of nonhomogeneous mixed DNA containing 6 fragments from 3,550 – 21,226 base pairs under the pDEP bias ( $7 V_{pp}$ ,  $f = 200$  kHz). (a) Tapping and (b) releasing of DNA at the tip (the red circle). (c)-(f) The motion of the tip with trapped DNA along the y-axis. The yellow arrow is  $100 \mu\text{m}$ . (g) Instant release of DNA at the tip by turning off the trap bias. The scalar bar is  $5 \mu\text{m}$ .

## Estimation of various forces acting on a particle in a fluid environment

We have calculated the magnitudes of various forces including electric thermo flow force, resistive drag, gravity, and buoyancy acting on a moving object in a fluid and compared to iDEP. We have used the DNA ( $R = 600$  nm) and velocity of 1 mm/s, which are comparable to our experimental conditions.

First, we estimated gravitational force acting on DNA,  $F_g = mg = 5 \times 10^{-19}$  N, which is negligible compared to iDEP estimated by the CM factor model (18 nN and 41.5 nN) in the main text.

Second, buoyant force can be calculated by  $F_B = \rho g V$ , where  $\rho$  is the density of the buffer (water), and  $V = 4\pi r^3/3$  is the volume of DNA in the spherical model in buffer.  $F_B$  in this assumption is  $2.8 \times 10^{-15}$  N, which is not comparable to iDEP.

Third, we estimated drag force by  $F_{drag} = 0.5C_d\rho Av^2 + 6\pi\eta rv$ , where  $C_d$  is drag coefficient ranging from 0.1 to 1,  $A$  is the cross section of an object moving in liquid,  $v$  is the velocity of an object, and  $\eta$  is viscosity<sup>1-2</sup>. The drag force is estimated to be  $1.02 \times 10^{-11}$  N, which is less than 1 % of iDEP.

Finally, we estimated the electric thermo flow force induced by applying AC voltage between two parallel electrodes. The time average force acting on a unit volume is described by,  $\langle f \rangle = -M(\omega, T) \left( \frac{\varepsilon\sigma V_{rms}^4}{2k\pi^3 r^3 T} \right) \left( 1 - \frac{2\theta}{\pi} \right)$ , where  $M$  is a dimensionless factor depending on applied frequency with its value  $|M| < 7$  at the frequency less than 1 MHz<sup>3</sup>. Here,  $\varepsilon$  is permittivity,  $\sigma$  is conductivity,  $k$  is thermal conductivity, and  $T$  is temperature.  $\theta$  and  $r$  are cylindrical coordinates, respectively, and the origin is located at the middle of two parallel electrodes. We calculated the maximum force by using the maximum of  $M(\omega, T) \sim 6.5$  and  $\theta = 0$ . At  $r = 10$   $\mu\text{m}$ , the maximum value of electro thermal fluid force is estimated as  $\langle f \rangle_{max} \sim 6.5 \left( \frac{\varepsilon\sigma V_{rms}^4}{2k\pi^3 r^3 T} \right) = 9.65 \times 10^{-17}$  N/ $\mu\text{m}^3$ , which is not comparable to iDEP.

Taken together, our iDEP tweezers enable us to spatially manipulate objects in a fluid, and therefore, our DNA manipulation experiments with iDEP are justified.

## References

- (1) White, F. *Fluid Mechanics*, 7th ed.; McGraw Hill: 2011.
- (2) Collinson, C.; Roper, T. *Particle Mechanics*, 1 ed.; Butterworth-Heinemann: 1995.
- (3) Ramos, A.; Morgan, H.; Green, N. G.; Castellanos, A. Ac electrokinetics: a review of forces in microelectrode structures. *J. Phys. D Appl. Phys.* **1998**, *31* (18), 2338.
